# Supplementary material for: Growth differentiation factor-15: a p53- and demethylation-upregulating gene represses cell proliferation, invasion, and tumorigenesis in bladder carcinoma cells
Source: PubMed Central journal article supplement (PMC4528199; doi:10.1038/srep12870), 2015-08-07
Supplement: srep12870-s1.pdf [file srep12870-s1.pdf]

**Growth differentiation factor-15: a p53- and demethylation-upregulating gene represses cell proliferation, invasion, and tumorigenesis in bladder carcinoma cells**

Ke-Hung Tsui<sup>1,3,#</sup>, Shu-Yuan Hsu<sup>2,#</sup>, Li-Chuan Chung<sup>2</sup>, Yu-Hsiang Lin<sup>1</sup>, Tsui-Hsia Feng<sup>4</sup>, Tzu-Yi Lee<sup>2</sup>, Phei-Lang Chang<sup>1,3</sup>, & Horng-Heng Juang<sup>2,\*</sup>

<sup>1</sup>Department of Urology, Chang Gung Memorial Hospital, Kwei-Shan, Tao-Yuan, Taiwan, ROC

<sup>2</sup>Department of Anatomy, College of Medicine, Chang Gung University, Kwei-Shan, Tao-Yuan, Taiwan, ROC

<sup>3</sup>Department of Traditional Chinese Medicine, College of Medicine, Chang Gung University, Kwei-Shan, Tao-Yuan, Taiwan, ROC

<sup>4</sup>School of Nursing, College of Medicine, Chang Gung University, Kwei-Shan, Tao-Yuan, Taiwan, ROC

Supplemental Figure 1

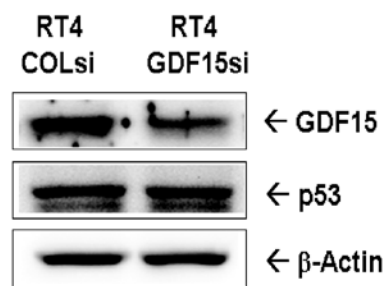

**Figure Supplement 1. Modulation of GDF15 on p53 expression in human bladder carcinoma RT4 cells.** Expressions of p53, GDF15, and  $\beta$ -actin in mock-knockdown RT4 (RT4-COLsi) and GDF15 knockdown RT4 (RT4-GDF15si) cells were determined by immunoblotting assays.
